# Supplementary material for: Projected Shifts in 21st Century Sardine Distribution and Catch in the California Current
Source: Frontiers journal article supplement (doi:10.3389/fmars.2021.685241), 2021-07-19
Supplement: Data_Sheet_1.PDF [file Data_Sheet_1.PDF]

Supplementary material for

**Projected shifts in 21st century sardine distribution and catch in the California Current.**

Jerome Fiechter, Mercedes Pozo Buil, Michael G. Jacox, Michael A. Alexander,  
Kenneth A. Rose

**Content:**

1. Supplementary figures 1-4
2. Input parameters for Nutrient-Phytoplankton-Zooplankton model
3. Input parameters for sardine individual-based model
4. Input parameters for fishing fleet model

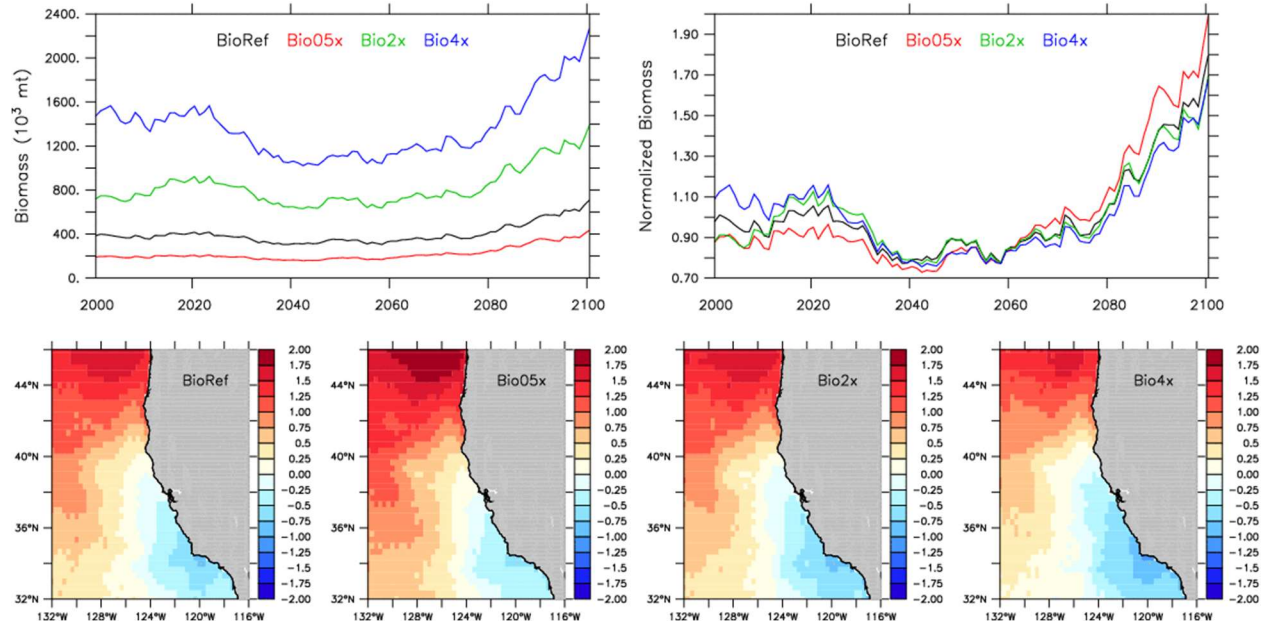

Supplementary Figure 1. Projected (GFDL) adult sardine population dynamics for different initial population biomasses. Top left: spawning stock biomass ( $10^3$  metric tons). Top right: spawning stock biomass relative to 2000-2100 mean. Bottom: future (2080-2100) minus historical (2000-2020) adult biomass normalized by 2000-2100 mean. “BioRef” denotes the reference initial population biomass used in this study ( $\sim 400 \cdot 10^3$  metric tons), “Bio05x” denotes initial biomass of half the reference ( $\sim 200 \cdot 10^3$  metric tons), “Bio2x” denotes initial biomass of twice the reference ( $\sim 800 \cdot 10^3$  metric ton), “Bio4x” denotes initial biomass of 4 times the reference ( $\sim 1,600 \cdot 10^3$  metric ton).

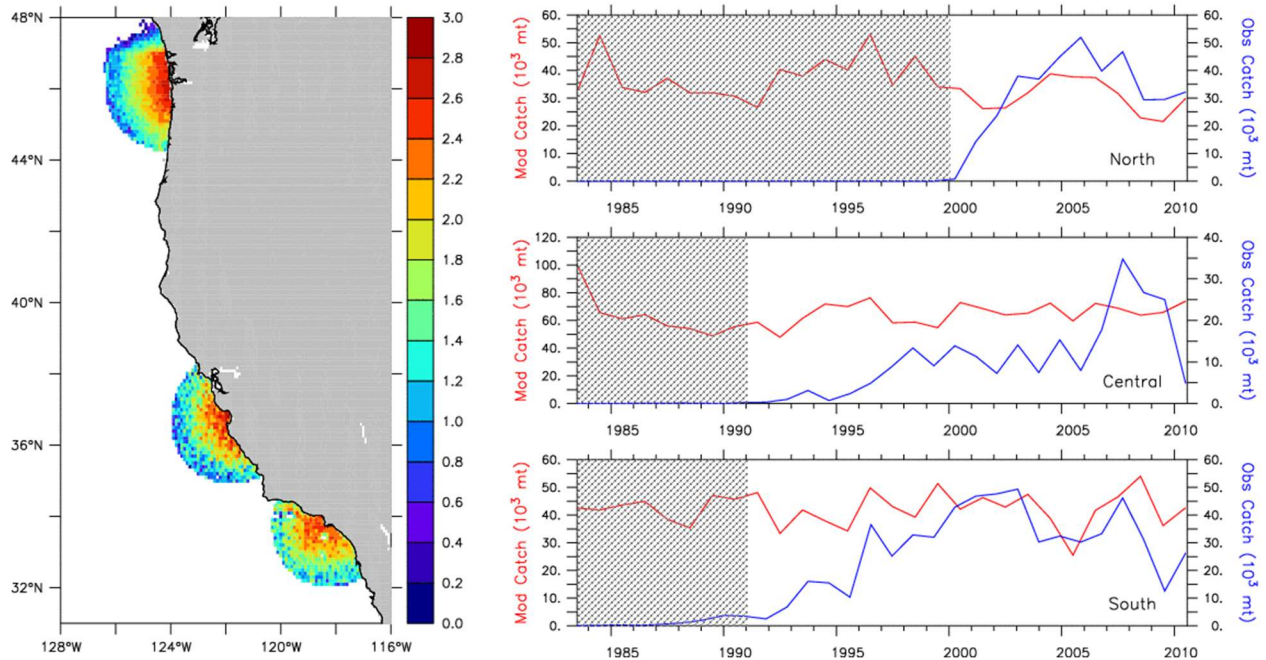

Supplementary Figure 2. Historical sardine catch from fishing fleet model for 1983-2010. Left: annual mean catch per unit effort (log(CPUE)). Right: simulated (red) and observed (blue) catch ( $10^3$  metric tons) for (from top to bottom) northern CCS (Astoria and Westport), central CCS (Monterey), and southern CCS (Long Beach). Observed catch is from Hill et al., 2010 and grayed out periods indicate times during which there were a moratorium, limited quotas, or no fishery.

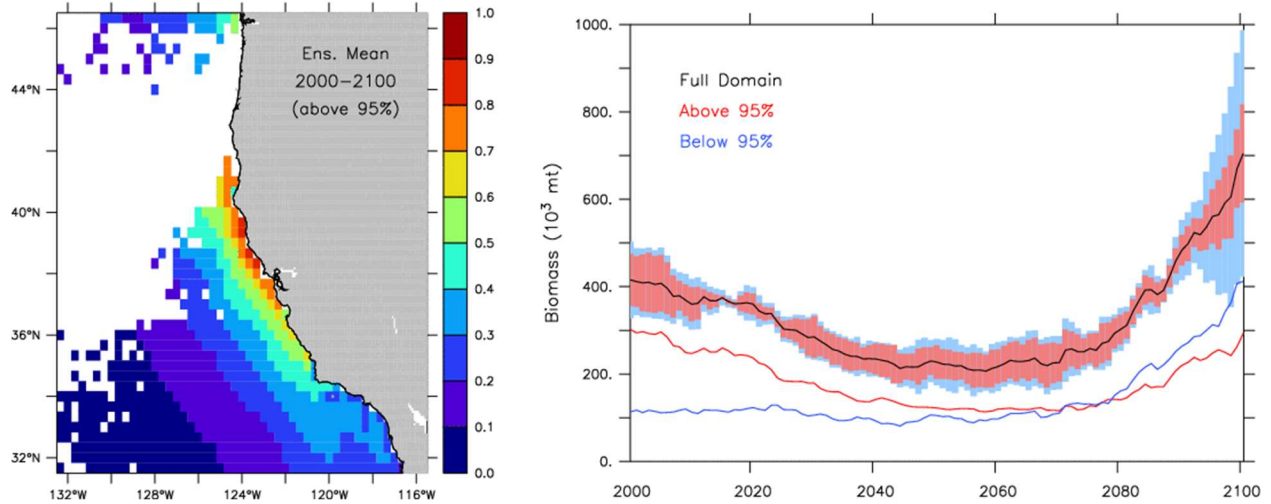

Supplementary Figure 3. Projection robustness for sardine spawning stock biomass. Left: ensemble mean spatial biomass ( $10^3$  metric tons) for 2000-2100 excluding locations (white shading) where GFDL, Hadley, and IPSL solutions are statistically different (95% confidence level). Right: Ensemble mean annual biomass ( $10^3$  metric tons) based on the full domain (black), statistically identical locations (red), and statistically different locations (blue). Shading around the full domain ensemble mean indicate multi-model spread contributed by statistically identical (red) and different (blue) locations.

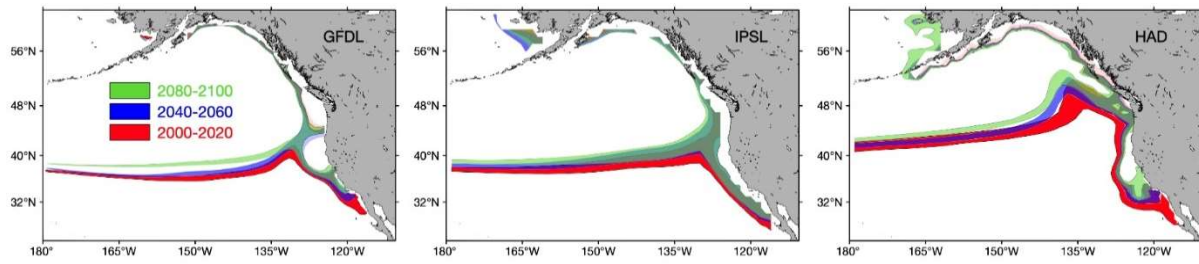

Supplementary Figure 4. Projections of the North Pacific Current (NPC) position for 2000-2020 (red), 2040-2060 (blue), and 2080-2100 (green) from GFDL (left), IPSL (center), and Hadley (right). The mean position of the NPC is defined as the region bounded by streamlines of the geostrophic currents that go poleward into the Gulf and Alaska and equatorward into the California Current.

## Input Parameters for NPZ Model

```
! Light attenuation due to seawater [1/m].

    AttSW == 0.04d0

! Light attenuation due to phytoplankton, self-shading coefficient,
! [m2/millimole_N].

    AttPS == 0.02d0          ! small biomass
    AttPL == 0.08d0          ! large biomass

! Fraction of shortwave radiation that is photosynthetically active,
! [nondimensional].

    PARfrac == 0.43d0

! Phytoplankton photochemical reaction coefficient, initial slope of
! the P-I curve [1/(W/m2) 1/day].

    AlphaPS == 0.04d0        ! small biomass
    AlphaPL == 0.04d0        ! large biomass

! Phytoplankton photoinhibition coefficient, [1/(W/m2) 1/day].

    BetaPS == 1.0d-3         ! small biomass
    BetaPL == 2.0d-3         ! large biomass

! Phytoplankton maximum photosynthetic rate at 0 Celsius [1/day].

    VmaxS == 0.4d0           ! small biomass
    VmaxL == 1.0d0           ! large biomass

! Phytoplankton half saturation constant for Nitrate [millimole_N/m3].

    KNO3S == 0.3d0           ! small biomass
    KNO3L == 3.0d0           ! large biomass

! Phytoplankton half saturation constant for Ammonium [millimole_N/m3].

    KNH4S == 0.1d0           ! small biomass
    KNH4L == 1.0d0           ! large biomass

! Phytoplankton half saturation constant for Silicate [millimole_Si/m3].

    KSiL == 3.0d0            ! large biomass

! Phytoplankton Ammonium inhibition coefficient [m3/millimole_N].

    PusaiS == 1.5d0          ! small biomass
    PusaiL == 1.5d0          ! large biomass
```

```

! Phytoplankton temperature coefficient for photosynthetic rate
[1/Celsius].

      KGppS == 6.93d-2          ! small biomass
      KGppL == 6.93d-2          ! large biomass

! Phytoplankton respiration rate at 0 Celsius [1/day].

      ResPS0 == 0.03d0          ! small biomass
      ResPL0 == 0.03d0          ! large biomass

! Phytoplankton temperature coefficient for respiration [1/Celsius].

      KResPS == 0.0693d0        ! small biomass
      KResPL == 0.0693d0        ! large biomass

! Phytoplankton ratio of extracellular excretion to photosynthesis
! [nondimensional].

      GammaS == 0.135d0         ! small biomass
      GammaL == 0.135d0         ! large biomass

! Phytoplankton mortality rate at 0 Celsius [m3/millimole_N 1/day].

      MorPS0 == 1.0d-2          ! small biomass
      MorPL0 == 1.0d-2          ! large biomass

! Phytoplankton temperature coefficient for mortality [1/Celsius].

      KMorPS == 6.93d-2         ! small biomass
      KMorPL == 6.93d-2         ! large biomass

! Zooplankton maximum grazing rate at 0 Celsius [1/day].

      GRmaxSps == 0.50d0        ! small Zoo on small phy
      GRmaxSpl == 0.20d0        ! small Zoo on large phy
      GRmaxLps == 0.10d0        ! large Zoo on small Phy
      GRmaxLpl == 0.30d0        ! large Zoo on large Phy
      GRmaxLzs == 0.10d0        ! large Zoo on small Zoo
      GRmaxPpl == 0.30d0        ! predator Zoo on large Phy
      GRmaxPzs == 0.00d0        ! predator Zoo on small Zoo
      GRmaxPzl == 0.10d0        ! predator Zoo on large Zoo

! Zooplankton temperature coefficient for grazing [1/Celsius].

      KGraS == 6.93d-2          ! small biomass
      KGraL == 6.93d-2          ! large biomass
      KGraP == 6.93d-2          ! predator biomass

! Zooplankton half-saturation coefficient (squared) for ingestion used
! only when the Holling-type grazing formulation is activated
! [millimole_N/m3]^2.

      KPS2ZS == 0.10d0          ! small Zoo on small Phy

```

```

KPL2ZS == 0.20d0          ! small Zoo on large Phy
KPS2ZL == 0.10d0          ! large Zoo on small Phy
KPL2ZL == 0.20d0          ! large Zoo on large Phy
KZS2ZL == 0.50d0          ! large Zoo on small Zoo
KPL2ZP == 0.20d0          ! predator Zoo on large Phy
KZS2ZP == 0.50d0          ! predator Zoo on small Zoo
KZL2ZP == 0.80d0          ! predator Zoo on large Zoo

! Zooplankton mortality rate at 0 Celsius [m3/millimole_N 1/day].

MorZS0 == 6.0d-2          ! small biomass
MorZL0 == 6.0d-2          ! large biomass
MorZP0 == 8.0d-2          ! predator biomass

! Zooplankton temperature coefficient for mortality [1/Celsius].

KMorZS == 0.0693d0        ! small biomass
KMorZL == 0.0693d0        ! large biomass
KMorZP == 0.0693d0        ! predator biomass

! Zooplankton assimilation efficiency [nondimensional].

AlphaZS == 0.70d0          ! small biomass
AlphaZL == 0.70d0          ! large biomass
AlphaZP == 0.70d0          ! predator biomass

! Zooplankton growth efficiency [nondimensional].

BetaZS == 0.30d0           ! small biomass
BetaZL == 0.30d0           ! large biomass
BetaZP == 0.30d0           ! predator biomass

! Decomposition rates at 0 Celsius [1/day].

Nit0 == 0.01d0             ! NH4 nitrification
VP2N0 == 0.08d0            ! PON to NH4
VP2D0 == 0.01d0            ! PON to DON
VD2N0 == 0.08d0            ! DON to NH4
VO2S0 == 0.02d0            ! Opal to Silicate

! Temperature coefficients for decomposition [1/Celsius]

KNit == 6.93d-2            ! NH4 nitrification
KP2D == 6.93d-2            ! PON to DON
KP2N == 6.93d-2            ! PON to NH4
KD2N == 6.93d-2            ! DON to NH4
KO2S == 6.93d-2            ! Opal to Silicate

! Si:N ratio [millimole_Si/millimole_N].

RSiN == 1.0d0

! Settling (sinking) velocities [m/day].

```



```
      setVPON == 20.0d0                ! PON
      setVOpal == 20.0d0              ! Opal

! Redfield Carbon:Nitrogen ratio [mole_C/mole_N] , {6.625d0}.

      RedCN == 6.625d0
```

## **Input Parameters for Sardine IBM**

! Fish start and end of spawning season [yearday]

Fspstr == 32.0d0  
Fspend == 182.0d0

! Min and max temperature for spawning season [C]

FspTmin == 12.0d0  
FspTmax == 15.0d0

! Opt and s.dev. temperature for kinesis [C]

FkinTopt == 13.0d0  
FkinTsdv == 3.0d0

! Opt and s.dev. p-value for kinesis [-]

FkinPVopt == 0.85d0  
FkinPVsdv == 0.10d0

! Fish preference for ZS, ZL, ZP

|                   |                  |
|-------------------|------------------|
| ZSpref_L == 1.0d0 | ! larval stage   |
| ZLpref_L == 0.2d0 | ! larval stage   |
| ZPpref_L == 0.0d0 | ! larval stage   |
| ZSpref_J == 0.2d0 | ! juvenile stage |
| ZLpref_J == 1.0d0 | ! juvenile stage |
| ZPpref_J == 0.1d0 | ! juvenile stage |
| ZSpref_A == 0.1d0 | ! adult stage    |
| ZLpref_A == 1.0d0 | ! adult stage    |
| ZPpref_A == 0.5d0 | ! adult stage    |

! Fish half saturation for ZS, ZL, ZP

|                  |                  |
|------------------|------------------|
| K_ZS_L == 0.02d0 | ! larval stage   |
| K_ZL_L == 0.02d0 | ! larval stage   |
| K_ZP_L == 0.00d0 | ! larval stage   |
| K_ZS_J == 0.10d0 | ! juvenile stage |
| K_ZL_J == 0.10d0 | ! juvenile stage |
| K_ZP_J == 0.10d0 | ! juvenile stage |
| K_ZS_A == 0.10d0 | ! adult stage    |
| K_ZL_A == 0.10d0 | ! adult stage    |
| K_ZP_A == 0.10d0 | ! adult stage    |

! Energy conversion from Zooplankton to Fish

! (CAL\_ZF = CAL\_Z/CAL\_F = 2580/7775)

Cal\_Z == 3800.0d0  
Cal\_F == 8000.0d0

! Fish consumption coefficient and exponent

```

a_C_L == 0.24d0      ! larval stage
a_C_J == 0.24d0      ! juvenile stage
a_C_A == 0.24d0      ! adult stage
b_C_L == 0.455d0     ! larval stage
b_C_J == 0.455d0     ! juvenile stage
b_C_A == 0.455d0     ! adult stage

! Fish maximum p-value

pvalmax_L == 1.0d0    ! larval stage
pvalmax_J == 1.0d0    ! juvenile stage
pvalmax_A == 1.0d0    ! adult stage

! Fish respiration coefficient and exponent

a_R_L == 3.3d-3       ! larval stage
a_R_J == 3.3d-3       ! juvenile stage
a_R_A == 3.3d-3       ! adult stage
b_R_L == 0.15d0        ! larval stage
b_R_J == 0.15d0        ! juvenile stage
b_R_A == 0.15d0        ! adult stage

! Fish activity (if 0, then activity computed from swimming)

activity_L == 0.0d0    ! larval stage
activity_J == 0.0d0    ! juvenile stage
activity_A == 0.0d0    ! adult stage

! Fish swimming coefficient and swimming speed

d_R_L == 3.0d-3        ! larval stage
d_R_J == 3.0d-3        ! juvenile stage
d_R_A == 3.0d-3        ! adult stage
Fswim_L == 3.0d0        ! larval stage
Fswim_J == 3.0d0        ! juvenile stage
Fswim_A == 3.0d0        ! adult stage

! Fish assimilation efficiency coefficient and exponent

a_AE_L == 0.60d0       ! larval stage
a_AE_J == 0.60d0       ! juvenile stage
a_AE_A == 0.60d0       ! adult stage
b_AE_L == 0.04d0        ! larval stage
b_AE_J == 0.04d0        ! juvenile stage
b_AE_A == 0.04d0        ! adult stage

! Fish assimilation efficiency maximum

AEmax_L == 0.7d0        ! larval stage
AEmax_J == 0.7d0        ! juvenile stage
AEmax_A == 0.7d0        ! adult stage

! Temperature coefficients for bioenergetics

```

```

te1_L == 10.0d0      ! larval stage
te1_J == 10.0d0      ! juvenile stage
te1_A == 10.0d0      ! adult stage
te2_L == 12.0d0      ! larval stage
te2_J == 12.0d0      ! juvenile stage
te2_A == 12.0d0      ! adult stage
te3_L == 16.0d0      ! larval stage
te3_J == 16.0d0      ! juvenile stage
te3_A == 16.0d0      ! adult stage
te4_L == 22.0d0      ! larval stage
te4_J == 27.0d0      ! juvenile stage
te4_A == 27.0d0      ! adult stage

xk1_L == 0.10d0      ! larval stage
xk1_J == 0.10d0      ! juvenile stage
xk1_A == 0.10d0      ! adult stage
xk2_L == 0.98d0      ! larval stage
xk2_J == 0.98d0      ! juvenile stage
xk2_A == 0.98d0      ! adult stage
xk3_L == 0.98d0      ! larval stage
xk3_J == 0.98d0      ! juvenile stage
xk3_A == 0.98d0      ! adult stage
xk4_L == 0.01d0      ! larval stage
xk4_J == 0.01d0      ! juvenile stage
xk4_A == 0.01d0      ! adult stage

cr_L == 3.0d-3        ! larval stage
cr_J == 3.0d-3        ! juvenile stage
cr_A == 3.0d-3        ! adult stage
tr_L == 0.0d0         ! larval stage
tr_J == 0.0d0         ! juvenile stage
tr_A == 0.0d0         ! adult stage

! Weight (g) and length (mm) at first feeding

Wffeed == 1.53d-3
Lffeed == 6.0d0

! Weight (g) and length (mm) for transition from larva to juvenile

WeightLJ == 0.395d0
LengthLJ == 35.0d0

! Weight (g) and length (mm) for transition from juvenile to adult

WeightJA == 0.395d0
LengthJA == 35.0d0

! Coefficients for weight to length conversion

aw2l_L == 5.4d-6      ! larval stage
aw2l_J == 5.4d-6      ! juvenile stage
aw2l_A == 5.4d-6      ! adult stage

```

```

        bw2l_L == 3.15d0          ! larval stage
        bw2l_J == 3.15d0          ! juvenile stage
        bw2l_A == 3.15d0          ! adult stage
        dSLk_L == 3.26d-3         ! larval stage
        dSLk_J == 3.26d-3         ! juvenile stage
        dSLk_A == 3.26d-3         ! adult stage
        dSLinf_L == 206.0d0        ! larval stage
        dSLinf_J == 206.0d0        ! juvenile stage
        dSLinf_A == 206.0d0        ! adult stage

! Coefficients for length to weight conversion

        al2w_L == 5.4d-6          ! larval stage
        al2w_J == 5.4d-6          ! juvenile stage
        al2w_A == 5.4d-6          ! adult stage
        bl2w_L == 3.15d0          ! larval stage
        bl2w_J == 3.15d0          ! juvenile stage
        bl2w_A == 3.15d0          ! adult stage

! Batch duration coefficient, exponent, and temperature

        abatch == 11.0d0
        bbatch == 0.015d0
        T0batch == 12.6d0
        apof == 5.0d0
        bpof == 0.015d0
        T0pof == 8.0d0

! Batch size parameters

        epq == 260.0d0
        eegg == 4500.0d0
        megg == 2.78d-4

! Breeding strategy

        breed == 3.0d0

! Matrurity coefficients

        amature == -18.16d0
        bmature == 0.1195d0

! Weight perecentage

        pctxwt == 0.5d0

! Gain percentage

        pctgain == 0.5d0

! Fish yearly natural mortality
! Daily for eggs->juvenile; Yearly for adults

```

```
Nmort_E == 0.72d0      ! egg stage
Nmort_Y == 0.67d0      ! yolksac stage
Nmort_L == 0.13d0      ! larval stage
Nmort_J == 0.0055d0    ! juvenile stage
Nmort_A == 0.40d0      ! adult stage
```

## **Input Parameters for Fishing Fleet Model**

! Maximum daily catch [kg]

CatchMax == 30000.0d0

! Cost per hour of traveling [\$]

TravCost == 30.0d0

! Boat motoring speed [km/h]

BoatVel == 20.0d0

! Catchability [-]

Qcatch == 0.01d0

! Time to fish and process catch at a location, [hr]

FishTime == 2.0d0

! Maximum number of encounters with fish, [-]

EncMax == 20

! Mean encounter rate (1.0 means boats see all fish in cell), [-]

EncRate == 0.9d0

! Price for catch by port [\$ / kg], {0.5d0}.

CatchPrice == 0.5d0 0.5d0 0.5d0 0.5d0
